# Supplementary material for: Application of Selection Mapping to Identify Genomic Regions Associated with Dairy Production in Sheep
Source: PubMed Central journal article supplement (PMC4006912; doi:10.1371/journal.pone.0094623), 2014-05-01
Supplement: pone.0094623.s001.pdf [file pone.0094623.s001.pdf]

Table S1 for

**Application of selection mapping to identify genomic regions associated with dairy production in sheep**

Authors: Beatriz Gutiérrez-Gil<sup>1\*</sup>, Juan Jose Arranz<sup>1</sup>, Ricardo Pong-Wong<sup>2</sup>, Elsa García-Gómez<sup>1</sup>, James Kijas<sup>3</sup>, Pamela Wiener<sup>2</sup>

**Table S1.** Candidate regions for signatures of selection identified on the basis of the pairwise  $F_{ST}$  analysis performed on six dairy–non-dairy breed pairs. For each dairy–non-dairy breed pair, the results contain the top 0.5th percent of the distributions of  $F_{ST}$  values, averaged in sliding windows of 9 SNPs. Only the regions that were found in at least two pairs of breeds (that did not have a breed in common) were labeled as  $F_{ST}$ -based candidate regions ( $F_{ST}$ -CRs). Gaps up to 2 Mb were allowed between positions identified within the same breed pair and between different breed pairs to consider a single selection signal. Positions of the markers (Mb) are referred to the Sheep Genome Assembly v2.0 (update September 2011).

| Fst-Candidate region (Fst-CR) | Chr | Breed Pair                          | Start marker     | Start position (Mb) | End marker       | End position (Mb) |
|-------------------------------|-----|-------------------------------------|------------------|---------------------|------------------|-------------------|
| Fst-CR1                       | 1   | Churra-Ojalada                      | OAR1_110170625   | 102.467714          | s70081           | 102.594066        |
|                               |     | Comisana-Australian Poll Merino     | OAR1_112076929   | 104.214069          | OAR1_112239116   | 104.372893        |
|                               |     | Chios-Sakiz                         | s11941           | 105.338083          | OAR1_113402761   | 105.563436        |
| Fst-CR2                       | 1   | Milk Lacaune-Meat Lacaune           | OAR1_245302998   | 228.057561          | OAR1_247070566   | 229.569756        |
|                               |     | East Friesian Brown-Finnsheep       | OAR1_245583569   | 228.280721          | OAR1_249572898   | 231.993714        |
| Fst-CR3                       | 2   | Churra-Ojalada                      | s60207           | 52.34599            | OAR2_55861669    | 52.563013         |
|                               |     | Milk Lacaune-Meat Lacaune           | OAR2_55752685    | 52.4461             |                  |                   |
|                               |     | Comisana-Australian Poll Merino     | OAR2_56432170    | 52.885699           |                  |                   |
|                               |     | Chios-Sakiz                         | OAR2_56768579    | 53.239006           | s23499           | 53.409079         |
| Fst-CR4                       | 2   | Comisana-Australian Poll Merino     | OAR2_87854424    | 83.150938           | OAR2_90110357    | 85.329228         |
|                               |     | Chios-Sakiz                         | OAR2_87942973    | 83.248507           |                  |                   |
| Fst-CR5                       | 3   | East Friesian Brown-Finnsheep       | s65219           | 18.951292           | s05622           | 19.360373         |
|                               |     | Milk Lacaune-Australian Poll Merino | s13092           | 19.188714           | s05622           | 19.360373         |
| Fst-CR6                       | 3   | East Friesian Brown-Finnsheep       | OAR3_84348827    | 79.410427           |                  |                   |
|                               |     | Chios-Sakiz                         | s63332           | 79.545868           | OAR3_84689579    | 79.728228         |
| Fst-CR7                       | 3   | Churra-Ojalada                      | s51772           | 152.679607          | OAR3_163641518   | 153.007357        |
|                               |     | Comisana-Australian Poll Merino     | OAR3_164170826   | 153.444621          | OAR3_165450843   | 154.582317        |
|                               |     | East Friesian Brown-Finnsheep       | OAR3_164788310   | 154.01323           | OAR3_165060142   | 154.207199        |
| Fst-CR8                       | 3   | East Friesian Brown-Finnsheep       | OAR3_180416904   | 167.711074          | OAR3_180484085   | 167.782385        |
|                               |     | Milk Lacaune-Australian Poll Merino | OAR3_180416904   | 167.711074          | OAR3_180647061   | 167.92624         |
| Fst-CR9                       | 3   | Milk Lacaune-Meat Lacaune           | s34668           | 209.872091          | s08021           | 210.525298        |
|                               |     | Milk Lacaune-Australian Poll Merino | s14713           | 211.970434          | s36662           | 212.063962        |
|                               |     | Comisana-Australian Poll Merino     | s26777           | 213.468361          | s38745           | 213.645308        |
|                               |     | East Friesian Brown-Finnsheep       | s68727           | 215.304893          | OAR3_234328134_X | 215.814066        |
| Fst-CR10                      | 4   | Chios-Sakiz                         | OAR4_59113372    | 55.121399           |                  |                   |
|                               |     | Milk Lacaune-Meat Lacaune           | s04516           | 55.485954           | s32998           | 55.645159         |
| Fst-CR11                      | 4   | Chios-Sakiz                         | s64477           | 72.568414           | OAR4_79957476    | 74.701765         |
|                               |     | East Friesian Brown-Finnsheep       | s12823           | 74.234142           |                  |                   |
| Fst-CR12                      | 4   | Milk Lacaune-Meat Lacaune           | OAR4_85593968    | 80.007532           | OAR4_90286613_X  | 84.344311         |
|                               |     | East Friesian Brown-Finnsheep       | OAR4_88152650    | 82.245971           | OAR4_88330712    | 82.403195         |
| Fst-CR13                      | 4   | Milk Lacaune-Australian Poll Merino | OAR4_102186070   | 95.801069           | OAR4_102504729   | 96.11515          |
|                               |     | Milk Lacaune-Meat Lacaune           | OAR4_102230122   | 95.85043            | OAR4_102402825   | 96.019593         |
|                               |     | Churra-Ojalada                      | s44110           | 97.181846           |                  |                   |
| Fst-CR14                      | 6   | Chios-Sakiz                         | OAR6_34086500    | 30.366856           | OAR6_34099005    | 30.37978          |
|                               |     | Milk Lacaune-Australian Poll Merino | OAR6_34609120    | 30.760292           | OAR6_43064935    | 38.243473         |
|                               |     | Comisana-Australian Poll Merino     | OAR6_38546054    | 34.536979           | OAR6_42185110    | 37.494544         |
|                               |     | Churra-Ojalada                      | OAR6_43842580    | 39.316435           | OAR6_44210019    | 39.577446         |
| Fst-CR15                      | 6   | Comisana-Australian Poll Merino     | OAR6_76284920    | 69.987431           | s13781           | 70.599139         |
|                               |     | Chios-Sakiz                         | OAR6_78103269    | 71.885158           |                  |                   |
| Fst-CR16                      | 7   | Chios-Sakiz                         | OAR7_57131990    | 51.584028           | OAR7_57384468    | 51.805664         |
|                               |     | East Friesian Brown-Finnsheep       | OAR7_57594015    | 52.07214            |                  |                   |
| Fst-CR17                      | 8   | East Friesian Brown-Finnsheep       | OAR8_34133754    | 31.505215           | s50528           | 32.978156         |
|                               |     | Churra-Ojalada                      | s50528           | 32.978156           | OAR8_35827974    | 33.178871         |
| Fst-CR18                      | 9   | Milk Lacaune-Meat Lacaune           | OAR9_60243687    | 57.362506           |                  |                   |
|                               |     | Chios-Sakiz                         | s71892           | 59.029356           |                  |                   |
|                               |     | Milk Lacaune-Australian Poll Merino | s13022           | 60.567978           | OAR9_63903278    | 60.821175         |
|                               |     | Comisana-Australian Poll Merino     | s57864           | 60.609845           | OAR9_63720685    | 60.628768         |
|                               |     | Churra-Ojalada                      | OAR9_63928272    | 60.846404           |                  |                   |
| Fst-CR19                      | 9   | Chios-Sakiz                         | OAR9_72753560    | 68.819131           |                  |                   |
|                               |     | East Friesian Brown-Finnsheep       | OAR9_72753560    | 68.819131           | OAR9_72793362    | 68.85534          |
|                               |     | Churra-Ojalada                      | OAR9_73519625    | 69.587011           | s46550           | 69.830122         |
| Fst-CR20                      | 10  | Churra-Ojalada                      | OAR10_38873282   | 36.309562           | OAR10_39526423_X | 36.868674         |
|                               |     | East Friesian Brown-Finnsheep       | OAR10_39356591   | 36.711162           | OAR10_40078675   | 37.480614         |
| Fst-CR21                      | 11  | Milk Lacaune-Meat Lacaune           | s43916           | 33.918454           | s37019           | 36.506595         |
|                               |     | Milk Lacaune-Australian Poll Merino | OAR11_36358079   | 34.118663           | s33971           | 34.163747         |
|                               |     | Chios-Sakiz                         | OAR11_37440114   | 35.253844           |                  |                   |
| Fst-CR22                      | 12  | Milk Lacaune-Australian Poll Merino | OAR12_8518601    | 6.113085            | s02824           | 6.314395          |
|                               |     | Churra-Ojalada                      | OAR12_10315606   | 7.84721             | OAR12_10373193   | 7.894632          |
| Fst-CR23                      | 13  | Milk Lacaune-Meat Lacaune           | s27419           | 48.971612           | OAR13_56607666   | 52.062577         |
|                               |     | Comisana-Australian Poll Merino     | OAR13_55596698   | 51.039293           | OAR13_55835685   | 51.277367         |
|                               |     | Milk Lacaune-Australian Poll Merino | s67173           | 52.777853           | OAR13_57596022   | 52.946055         |
| Fst-CR24                      | 13  | Comisana-Australian Poll Merino     | s48133           | 62.276683           | OAR13_71091738   | 65.811237         |
|                               |     | Churra-Ojalada                      | OAR13_69221369_X | 63.911086           | s17594           | 64.053077         |
| Fst-CR25                      | 15  | Churra-Ojalada                      | s64562           | 16.673108           | OAR15_21513878   | 20.687439         |
|                               |     | East Friesian Brown-Finnsheep       | s28843           | 21.72601            |                  |                   |
| Fst-CR26                      | 15  | Comisana.vs.AustralianPollMerino    | s31340           | 72.774077           | s73092           | 72.88226          |
|                               |     | Chios.vs.Sakiz                      | OAR15_80448054   | 74.499334           | s72518           | 74.550363         |
| Fst-CR27                      | 16  | East Friesian Brown-Finnsheep       | OAR16_40313142   | 37.347459           | OAR16_44102697   | 40.850203         |
|                               |     | Milk Lacaune-Australian Poll Merino | OAR16_42131900   | 39.068289           | s15191           | 39.263122         |
|                               |     | Comisana-Australian Poll Merino     | OAR16_44680056   | 40.165782           | OAR16_44884811   | 40.330712         |
| Fst-CR28                      | 22  | Chios-Sakiz                         | OAR22_24682845   | 20.925489           | OAR22_24815596   | 21.058183         |
|                               |     | East Friesian Brown-Finnsheep       | OAR22_26951573   | 22.959209           | s67752           | 23.157094         |
