# Supplementary material for: Application of Selection Mapping to Identify Genomic Regions Associated with Dairy Production in Sheep
Source: PubMed Central journal article supplement (PMC4006912; doi:10.1371/journal.pone.0094623), 2014-05-01
Supplement: pone.0094623.s002.pdf [file pone.0094623.s002.pdf]

Table S2 for

**Application of selection mapping to identify genomic regions associated with dairy production in sheep**

Authors: Beatriz Gutiérrez-Gil<sup>1\*</sup>, Juan Jose Arranz<sup>1</sup>, Ricardo Pong-Wong<sup>2</sup>, Elsa García-Gómez<sup>1</sup>, James Kijas<sup>3</sup>, Pamela Wiener<sup>2</sup>

**Table S2.** Candidate regions identified based on reduced heterozygosity signals identified in at least two of the analyzed dairy breeds. Non-dairy breeds showing a coincident reduced heterozygosity signal are also indicated. For each breed, the results contain the bottom 0.5th percent of the distributions of observed heterozygosity values, averaged in sliding windows of 9 SNPs. Only the regions that were found in at least two dairy breeds were labeled as candidate regions based on the reduction of observed heterozygosity (ObsHtz-CRs). Gaps up to 2 Mb were allowed between positions identified within the same breed and between different breeds to consider a single selection signal. Positions of the markers (Mb) are referred to the Sheep Genome Assembly v2.0 (update September 2011).

| ObsHtz-Candidate region<br>(ObsHtz-CR) | Chr | Dairy breeds                                             |                                                                      |                                                      |                                                                      |                                                      | Non-dairy breeds                                                        |                                                                                        |                                                                   |                                                                                |                                                                    |
|----------------------------------------|-----|----------------------------------------------------------|----------------------------------------------------------------------|------------------------------------------------------|----------------------------------------------------------------------|------------------------------------------------------|-------------------------------------------------------------------------|----------------------------------------------------------------------------------------|-------------------------------------------------------------------|--------------------------------------------------------------------------------|--------------------------------------------------------------------|
|                                        |     | Breeds                                                   | Start marker                                                         | Start position (Mb)                                  | End marker                                                           | End position (Mb)                                    | Breeds                                                                  | Start marker                                                                           | Start position (Mb)                                               | End marker                                                                     | End position (Mb)                                                  |
| Obs_Htz1                               | 1   | Milk Lacaune<br>Churra                                   | OAR1_137761966<br>OAR1_138170073                                     | 127.147272<br>127.525829                             | OAR1_137785444<br>OAR1_138302052                                     | 127.181978<br>127.655271                             | Finnsheep                                                               | OAR1_138135147                                                                         | 127.487148                                                        | s13122                                                                         | 127.757038                                                         |
| Obs_Htz2                               | 1   | Comisana<br>Chios                                        | s43775<br>s73989                                                     | 191.715311<br>191.896602                             | s28201<br>OAR1_207015625_X                                           | 191.726576<br>191.993294                             | Australian Poll Merino                                                  | s03519                                                                                 | 191.732813                                                        |                                                                                |                                                                    |
| Obs_Htz3                               | 2   | Comisana<br>Churra                                       | OAR2_20411070<br>OAR2_20494849                                       | 20.132217<br>20.200641                               | OAR2_20557855                                                        | 20.27409                                             |                                                                         |                                                                                        |                                                                   |                                                                                |                                                                    |
| Obs_Htz4                               | 2   | Comisana<br>East Frisian Brown                           | OAR2_76331680<br>OAR2_77962229                                       | 72.044265<br>73.59807                                | OAR2_79499240<br>OAR2_78106813                                       | 75.030746<br>73.747233                               | Finnsheep<br>Meat Lacaune<br>Australian Poll Merino                     | OAR2_75832730<br>OAR2_77568893<br>OAR2_77705450                                        | 71.577808<br>73.183462<br>73.305483                               | OAR2_75908169<br>OAR2_77690140<br>s59857                                       | 71.612583<br>73.288963<br>73.888851                                |
| Obs_Htz5                               | 2   | Milk Lacaune<br>Churra                                   | s41033<br>s22902                                                     | 104.332992<br>104.395536                             | OAR2_111932274<br>s67874                                             | 104.586592<br>104.642351                             | Meat Lacaune<br>Finnsheep<br>Ojalada<br>Australian Poll Merino          | s41033<br>s22902<br>s22902<br>s29891                                                   | 104.332992<br>104.395536<br>104.395536<br>104.501488              | OAR2_111932274<br>OAR2_111932274<br>s29891                                     | 104.586592<br>104.642351<br>104.501488                             |
| Obs_Htz6                               | 2   | Churra<br>Milk Lacaune<br>Comisana<br>Chios              | OAR2_130265015<br>OAR2_130413374<br>s18930<br>OAR2_130656808         | 122.212699<br>122.472584<br>122.622313<br>122.697031 | OAR2_130817865<br>OAR2_130656808<br>s46322<br>OAR2_131507986         | 122.86725<br>122.697031<br>123.095079<br>123.721808  | Ojalada                                                                 | OAR2_130413374                                                                         | 122.472584                                                        | OAR2_130656808                                                                 | 122.697031                                                         |
| Obs_Htz7                               | 2   | East Frisian Brown<br>Churra                             | OAR2_190455427<br>OAR2_193567149                                     | 180.309886<br>183.403726                             | OAR2_192112657                                                       | 181.952078                                           |                                                                         |                                                                                        |                                                                   |                                                                                |                                                                    |
| Obs_Htz8                               | 2   | Chios<br>Milk Lacaune                                    | OAR2_210373144<br>s70318                                             | 199.479344<br>199.813655                             | OAR2_210391244                                                       | 199.493856                                           |                                                                         |                                                                                        |                                                                   |                                                                                |                                                                    |
| Obs_Htz9                               | 2   | Chios<br>Comisana                                        | OAR2_222355235<br>OAR2_222355235                                     | 211.20491<br>211.20491                               |                                                                      |                                                      | Ojalada<br>Australian Poll Merino                                       | OAR2_222327692<br>OAR2_222518452                                                       | 211.177754<br>211.36389                                           |                                                                                |                                                                    |
| Obs_Htz10                              | 2   | Milk Lacaune<br>Churra                                   | OAR2_244597797<br>s01478                                             | 232.586994<br>234.42203                              | OAR2_244925652<br>OAR2_246577997                                     | 232.809436<br>234.454459                             |                                                                         |                                                                                        |                                                                   |                                                                                |                                                                    |
| Obs_Htz11                              | 2   | Churra<br>Comisana<br>Milk Lacaune                       | OAR2_252085914<br>s68726<br>s68726                                   | 239.683321<br>241.681223<br>241.681223               | s04809<br>s72745<br>s64586                                           | 241.810875<br>241.755749<br>241.79047                | Meat Lacaune<br>Australian Poll Merino<br>Finnsheep<br>Ojalada          | OAR2_252367108<br>s58181<br>s10651<br>s10651                                           | 239.948483<br>240.928078<br>241.717335<br>241.717335              | s00772<br>s04809                                                               | 241.977125<br>241.810875<br>241.929821                             |
| Obs_Htz12                              | 3   | Churra<br>Milk Lacaune                                   | s46658<br>s46658                                                     | 18.647955<br>18.647955                               | s00385                                                               | 18.858614                                            |                                                                         |                                                                                        |                                                                   |                                                                                |                                                                    |
| Obs_Htz13                              | 3   | Milk Lacaune<br>East Frisian Brown<br>Comisana           | OAR3_34159096<br>OAR3_34209284<br>OAR3_34470839                      | 31.475728<br>31.520076<br>31.786813                  | s67270<br>s67270<br>s67270                                           | 32.053944<br>32.053944<br>32.053944                  | Meat Lacaune<br>Ojalada<br>Finnsheep                                    | OAR3_34159096<br>OAR3_34209284<br>OAR3_35192406                                        | 31.475728<br>31.520076<br>32.520276                               | OAR3_34470839                                                                  | 31.786813                                                          |
| Obs_Htz14                              | 3   | Milk Lacaune<br>Chios<br>Churra                          | OAR3_79812234<br>s40967<br>s40967                                    | 75.12407<br>75.200035<br>75.200035                   | s52383<br>OAR3_79936157<br>OAR3_80038014_X                           | 75.334539<br>75.239426<br>75.340524                  | Finnsheep                                                               | s40967                                                                                 | 75.200035                                                         |                                                                                |                                                                    |
| Obs_Htz15                              | 3   | Comisana<br>Chios<br>East Frisian Brown                  | OAR3_127437500<br>s70128<br>OAR3_127924329_X                         | 119.375297<br>119.623504<br>119.921829               | OAR3_127719431<br>s70128<br>OAR3_127956387_X                         | 119.73187<br>119.623504<br>119.9636                  | Ojalada                                                                 | OAR3_128558246                                                                         | 120.420761                                                        |                                                                                |                                                                    |
| Obs_Htz16                              | 3   | East Frisian Brown<br>Chios                              | OAR3_134591031<br>OAR3_134841132                                     | 125.994367<br>126.252978                             | OAR3_134708445                                                       | 126.116303                                           | Ojalada                                                                 | OAR3_132722549                                                                         | 124.350223                                                        | OAR3_132876525                                                                 | 124.473799                                                         |
| Obs_Htz17                              | 3   | Comisana<br>Milk Lacaune                                 | s26177<br>OAR3_165060142                                             | 153.950444<br>154.207199                             | OAR3_165549468_X<br>OAR3_165200988                                   | 154.679398<br>154.347363                             | Meat Lacaune<br>Sakiz                                                   | OAR3_165050963<br>OAR3_165050963                                                       | 154.197278<br>154.197278                                          | OAR3_165060142<br>OAR3_166244306                                               | 154.207199<br>155.291702                                           |
| Obs_Htz18                              | 3   | Churra<br>Milk Lacaune                                   | s75549<br>OAR3_175355785                                             | 163.340446<br>163.685017                             | s28012                                                               | 163.447575                                           | Sakiz<br>Finnsheep<br>Meat Lacaune                                      | s35593<br>OAR3_174446873<br>OAR3_175355785                                             | 162.838475<br>163.148256<br>163.685017                            | s03123                                                                         | 163.200412                                                         |
| Obs_Htz19                              | 3   | Churra<br>Milk Lacaune<br>East Frisian Brown<br>Comisana | OAR3_181499831<br>OAR3_181499831<br>OAR3_181535066<br>OAR3_181576673 | 168.655327<br>168.655327<br>168.688319<br>168.751495 | OAR3_181815353<br>OAR3_181815353<br>OAR3_182492456<br>OAR3_181714610 | 168.958984<br>168.958984<br>169.636983<br>168.866473 | Australian Poll Merino<br>Meat Lacaune<br>Finnsheep<br>Ojalada<br>Sakiz | OAR3_181535066<br>OAR3_181535066<br>OAR3_181576673<br>OAR3_181576673<br>OAR3_181688249 | 168.688319<br>168.688319<br>168.751495<br>168.751495<br>168.83807 | OAR3_181815353<br>OAR3_181714610<br>OAR3_181714610<br>s36931<br>OAR3_181815353 | 168.958984<br>168.866473<br>168.866473<br>170.561972<br>168.958984 |
| Obs_Htz20                              | 3   | Churra<br>Milk Lacaune                                   | OAR3_196791000<br>OAR3_196913312                                     | 182.497709<br>182.643043                             | OAR3_197402139                                                       | 183.099123                                           | Meat Lacaune                                                            | OAR3_196913312                                                                         | 182.643043                                                        |                                                                                |                                                                    |
| Obs_Htz21                              | 3   | Chios<br>Churra<br>East Frisian Brown                    | OAR3_229873996<br>s17644<br>OAR3_233491871                           | 211.624402<br>212.763057<br>214.981744               | s22341<br>s66905<br>s35739                                           | 211.87793<br>213.048035<br>215.4033                  | Australian Poll Merino<br>Ojalada                                       | s41320<br>DU384041_287                                                                 | 211.806587<br>212.622841                                          | s23020                                                                         | 212.887492                                                         |

|           |    |                    |                  |            |                |            |                        |                 |            |                 |           |  |  |
|-----------|----|--------------------|------------------|------------|----------------|------------|------------------------|-----------------|------------|-----------------|-----------|--|--|
| Obs_Htz22 | 4  | Churra             | 0AR4_11306223    | 10.518307  | 0AR4_12079184  | 11.293408  | Meat Lacaune           | 0AR4_12079184   | 11.293408  |                 |           |  |  |
|           |    | Comisana           | 0AR4_12000546    | 11.218811  |                |            | Ojalada                | 0AR4_12079184   | 11.293408  |                 |           |  |  |
| Obs_Htz23 | 4  | Comisana           | s28608           | 97.763212  | 0AR4_105812413 | 98.865276  | Australian Poll Merino | s16828          | 97.812402  | s37018          | 97.871965 |  |  |
|           |    | Churra             | s16828           | 97.812402  | s37018         | 97.871965  | Ojalada                | s37018          | 97.871965  |                 |           |  |  |
| Obs_Htz24 | 4  | Milk Lacaune       | s06803           | 112.216316 | 0AR4_120520710 | 112.268889 | Finnsheep              | s56814          | 113.730938 |                 |           |  |  |
|           |    | Churra             | 0AR4_121859278   | 113.688324 |                |            |                        |                 |            |                 |           |  |  |
| Obs_Htz25 | 5  | Chios              | 0AR5_43897574    | 40.407364  | s72060         | 41.107358  |                        |                 |            |                 |           |  |  |
|           |    | Milk Lacaune       | s74709           | 40.894605  |                |            |                        |                 |            |                 |           |  |  |
| Obs_Htz26 | 6  | Milk Lacaune       | 0AR6_26894928    | 23.623375  | 0AR6_29577816  | 25.949127  | Meat Lacaune           | 0AR6_26396811   | 23.210527  | 0AR6_26894928   | 23.623375 |  |  |
|           |    | Chios              | s17623           | 25.885521  |                |            | Ojalada                | 0AR6_26396811   | 23.210527  | 0AR6_31567469   | 27.819055 |  |  |
|           |    |                    |                  |            |                |            | Australian Poll Merino | 0AR6_31621001   | 27.872898  |                 |           |  |  |
|           |    |                    |                  |            |                |            | Sakiz                  | 0AR6_33453920   | 29.69792   |                 |           |  |  |
| Obs_Htz27 | 6  | Milk Lacaune       | 0AR6_38585187    | 34.57594   | 0AR6_42834740  | 38.054381  | Australian Poll Merino | 0AR6_36395028   | 32.401102  | 0AR6_46589899   | 41.873949 |  |  |
|           |    | Comisana           | 0AR6_41044118    | 36.436857  | 0AR6_42317192  | 37.632679  | Meat Lacaune           | 0AR6_38383335   | 34.365051  | 0AR6_44473865   | 39.833644 |  |  |
|           |    | Churra             | s16069           | 41.629024  | s38254         | 41.862923  | Ojalada                | s43499          | 36.056663  | 0AR6_48259046   | 43.363614 |  |  |
| Obs_Htz28 | 7  | Churra             | 0AR7_19866890_X  | 19.072325  | s68550         | 19.257574  |                        |                 |            |                 |           |  |  |
|           |    | Milk Lacaune       | 0AR7_19928730    | 19.134616  |                |            |                        |                 |            |                 |           |  |  |
| Obs_Htz29 | 7  | Comisana           | 0AR7_46818598    | 42.026482  |                |            |                        |                 |            |                 |           |  |  |
|           |    | Chios              | 0AR7_47960594    | 43.116197  | s68972         | 43.570232  |                        |                 |            |                 |           |  |  |
| Obs_Htz30 | 7  | Milk Lacaune       | 0AR7_60354601    | 54.41476   | s30690         | 58.162605  | Ojalada                | 0AR7_60354601   | 54.41476   | 0AR7_66685731   | 60.560526 |  |  |
|           |    | Chios              | 0AR7_65038832    | 59.047277  | 0AR7_65338086  | 59.341935  | Meat Lacaune           | 0AR7_62610703   | 56.372667  | 0AR7_65264623   | 59.275972 |  |  |
|           |    | Churra             | 0AR7_65120201    | 59.12761   |                |            | Australian Poll Merino | s00240          | 58.138119  | s51528          | 60.408964 |  |  |
|           |    | Comisana           | 0AR7_66489587    | 60.45256   | 0AR7_66685731  | 60.560526  | Finnsheep              | s30690          | 58.162605  | 0AR7_64371135   | 58.364778 |  |  |
|           |    |                    |                  |            |                |            | Australian Poll Merino | 0AR7_64280352   | 58.272169  | s51528          | 60.408964 |  |  |
|           |    |                    |                  |            |                |            | Sakiz                  | 0AR7_64854028   | 58.864481  | 0AR7_66229320   | 60.192716 |  |  |
| Obs_Htz31 | 8  | Milk Lacaune       | 0AR8_83750883    | 78.04147   |                |            |                        |                 |            |                 |           |  |  |
|           |    | East Frisian Brown | s34293           | 78.728134  | s66278         | 78.759335  |                        |                 |            |                 |           |  |  |
| Obs_Htz32 | 9  | Milk Lacaune       | s09014           | 74.560664  | s39785         | 74.609642  | Australian Poll Merino | s09014          | 74.560664  |                 |           |  |  |
|           |    | Chios              | 0AR9_80693962    | 76.140824  | 0AR9_80804089  | 76.242733  | Meat Lacaune           | s09014          | 74.560664  |                 |           |  |  |
|           |    |                    |                  |            |                |            | Ojalada                | s22340          | 74.659349  |                 |           |  |  |
|           |    |                    |                  |            |                |            | Sakiz                  | 0AR9_80534807_X | 75.985327  | 0AR9_81054740_X | 76.651847 |  |  |
| Obs_Htz33 | 10 | Comisana           | 0AR10_26652355   | 24.855758  | s38815         | 28.800676  | Finnsheep              | 0AR10_27085156  | 25.261864  | 0AR10_29546872  | 27.557292 |  |  |
|           |    | Churra             | 0AR10_28646479   | 26.67809   | 0AR10_29737372 | 27.837794  | Meat Lacaune           | 0AR10_29448537  | 27.460172  | 0AR10_29737372  | 27.837794 |  |  |
|           |    | Milk Lacaune       | 0AR10_29389966_X | 27.398222  | 0AR10_29793750 | 27.896977  | Ojalada                | 0AR10_29538398  | 27.547387  | 0AR10_30790959  | 28.876748 |  |  |
| Obs_Htz34 | 10 | Comisana           | 0AR10_44470993   | 42.082634  | 0AR10_44655795 | 42.272772  | Finnsheep              | 0AR10_43391432  | 40.671337  | 0AR10_45065959  | 42.682521 |  |  |
|           |    | Chios              | 0AR10_44655795   | 42.272772  | 0AR10_44834335 | 42.474049  | Ojalada                | 0AR10_44470993  | 42.082634  | 0AR10_44834335  | 42.474049 |  |  |
|           |    | Milk Lacaune       | 0AR10_44655795   | 42.272772  | 0AR10_44834335 | 42.474049  | Sakiz                  | 0AR10_44470993  | 42.082634  | 0AR10_44615697  | 42.230982 |  |  |
|           |    |                    |                  |            |                |            | Meat Lacaune           | 0AR10_44509259  | 42.123799  | 0AR10_44834335  | 42.474049 |  |  |
| Obs_Htz35 | 11 | Churra             | 0AR11_18701428   | 18.346557  | s69909         | 18.602308  | Meat Lacaune           | s13840          | 16.449218  | s27474          | 18.671334 |  |  |
|           |    | Milk Lacaune       | 0AR11_18701428   | 18.346557  | s27474         | 18.671334  | Ojalada                | 0AR11_18701428  | 18.346557  | s69909          | 18.602308 |  |  |
|           |    | Comisana           | 0AR11_18815864   | 18.454208  | 0AR11_18909056 | 18.544951  | Australian Poll Merino | 0AR11_18815864  | 18.454208  | 0AR11_19810690  | 19.403144 |  |  |
|           |    |                    |                  |            |                |            | Sakiz                  | 0AR11_19810690  | 19.403144  |                 |           |  |  |
| Obs_Htz36 | 11 | East Frisian Brown | s59074           | 22.135921  | 0AR11_23034869 | 22.199593  | Meat Lacaune           | s51197          | 22.183054  | s43495          | 22.368448 |  |  |
|           |    | Churra             | s51197           | 22.183054  |                |            |                        |                 |            |                 |           |  |  |
|           |    | Milk Lacaune       | s51197           | 22.183054  | s43495         | 22.368448  |                        |                 |            |                 |           |  |  |
| Obs_Htz37 | 12 | Comisana           | s13858           | 24.480926  |                |            | Sakiz                  | 0AR11_26873926  | 25.777153  | s31301          | 26.612875 |  |  |
|           |    | Churra             | s14394           | 24.545136  | s43122         | 24.803153  | Australian Poll Merino | s51636          | 26.318526  | s23362          | 29.221714 |  |  |
|           |    | Chios              | s10340           | 24.60133   | s62452         | 29.530127  |                        |                 |            |                 |           |  |  |
|           |    | Milk Lacaune       | 0AR11_27752920   | 26.50247   |                |            |                        |                 |            |                 |           |  |  |
| Obs_Htz38 | 12 | Churra             | 0AR12_61804737   | 55.672814  | s66802         | 55.842304  | Australian Poll Merino | s66802          | 55.842304  | 0AR12_61974786  | 55.848797 |  |  |
|           |    | Milk Lacaune       | 0AR12_61874204   | 55.74348   | 0AR12_61974786 | 55.848797  | Meat Lacaune           | s66802          | 55.842304  | 0AR12_61974786  | 55.848797 |  |  |
|           |    | Comisana           | s66802           | 55.842304  |                |            | Australian Poll Merino |                 |            |                 |           |  |  |
| Obs_Htz39 | 12 | Churra             | s30614           | 58.136309  | 0AR12_64628319 | 58.302665  | Meat Lacaune           | s30614          | 58.136309  |                 |           |  |  |
|           |    | East Frisian Brown | s26801           | 58.576013  | 0AR12_64944672 | 58.61688   |                        |                 |            |                 |           |  |  |
| Obs_Htz40 | 13 | Churra             | 0AR13_33752762   | 30.635254  | 0AR13_33955992 | 30.85995   | Ojalada                | 0AR13_33752762  | 30.635254  | 0AR13_33896421  | 30.786161 |  |  |
|           |    | Milk Lacaune       | 0AR13_33896421   | 30.786161  | 0AR13_33955992 | 30.85995   | Australian Poll Merino | 0AR13_34032007  | 30.939655  | 0AR13_34176651  | 31.065051 |  |  |

|           |    |                                                |                                                      |                                                  |                                      |                                                  |                                                                |                                                                      |                                                  |                                                              |                                                  |
|-----------|----|------------------------------------------------|------------------------------------------------------|--------------------------------------------------|--------------------------------------|--------------------------------------------------|----------------------------------------------------------------|----------------------------------------------------------------------|--------------------------------------------------|--------------------------------------------------------------|--------------------------------------------------|
| Obs_Htz41 | 13 | Milk Lacaune<br>Comisana                       | s08503<br>OAR13_54016379                             | 39.88509<br>41.65332                             | s20479                               | 41.694042                                        |                                                                |                                                                      |                                                  |                                                              |                                                  |
| Obs_Htz42 | 13 | Chios<br>Comisana                              | OAR13_60893851<br>s31201                             | 56.060654<br>56.339588                           | OAR13_68535533<br>s63708             | 63.227469<br>63.78132                            | Sakiz<br>Finnsheep<br>Australian Poll Merino                   | s31558<br>OAR13_67067820<br>s48133                                   | 56.277903<br>61.900545<br>62.276683              | s13874<br>s19346<br>OAR13_67425309                           | 63.323127<br>62.210378<br>62.371867              |
| Obs_Htz43 | 15 | Churra<br>Comisana                             | OAR15_37160581<br>OAR15_37160581                     | 35.602806<br>35.602806                           | OAR15_37380344<br>OAR15_37443121     | 35.789479<br>35.84624                            | Finnsheep                                                      | s65735                                                               | 31.027264                                        |                                                              |                                                  |
| Obs_Htz44 | 15 | Chios<br>Milk Lacaune                          | s02793<br>s28875                                     | 72.842543<br>72.948461                           |                                      |                                                  | Finnsheep<br>Australian Poll Merino<br>Meat Lacaune<br>Ojalada | OAR15_77074005<br>s28875<br>s28875<br>s28875                         | 71.384913<br>72.948461<br>72.948461<br>72.948461 | OAR15_77122668<br>s52687                                     | 71.432136<br>72.988365                           |
| Obs_Htz45 | 16 | Comisana<br>East Frisian Brown                 | OAR16_51977009<br>OAR16_52089645                     | 48.03606<br>48.143409                            |                                      |                                                  |                                                                |                                                                      |                                                  |                                                              |                                                  |
| Obs_Htz46 | 17 | Churra<br>Milk Lacaune                         | OAR17_64627979<br>OAR17_64889221                     | 59.584736<br>59.812538                           | s37924<br>s37924                     | 60.05064<br>60.05064                             | Meat Lacaune                                                   | OAR17_64889221                                                       | 59.812538                                        | s37924                                                       | 60.05064                                         |
| Obs_Htz47 | 20 | Churra<br>Milk Lacaune                         | OAR20_44626939<br>OAR20_44626939                     | 40.652715<br>40.652715                           | s17843<br>s37017                     | 40.959336<br>40.920512                           | Meat Lacaune<br>Australian Poll Merino                         | OAR20_44626939<br>s64274                                             | 40.652715<br>41.01732                            | s37017                                                       | 40.920512                                        |
| Obs_Htz48 | 20 | Churra<br>Comisana<br>Chios<br>Milk Lacaune    | OAR20_54497778<br>OAR20_54497778<br>s61798<br>s61798 | 49.766895<br>49.766895<br>49.816123<br>49.816123 | s35415<br>s35415<br>s35415<br>s35415 | 49.979989<br>49.979989<br>49.979989<br>49.979989 | Meat Lacaune<br>Finnsheep                                      | s61798<br>s35415                                                     | 49.816123<br>49.979989                           | s35415                                                       | 49.979989                                        |
| Obs_Htz49 | 21 | Chios<br>Milk Lacaune                          | s52830<br>s41284                                     | 27.451792<br>29.40318                            | OAR21_30678813<br>s75804             | 27.471775<br>29.587175                           | Meat Lacaune<br>Australian Poll Merino<br>Ojalada              | s75804<br>s38134<br>s38134                                           | 29.587175<br>29.447881<br>29.447881              | s75804<br>s44540<br>s44540                                   | 29.587175<br>29.507008<br>29.507008              |
| Obs_Htz50 | 21 | Churra<br>Comisana<br>Milk Lacaune             | s72899<br>OAR21_46682445<br>OAR21_46682445           | 38.858968<br>40.738496<br>40.738496              | s59728                               | 38.91103                                         | Australian Poll Merino                                         | OAR21_46682445                                                       | 40.738496                                        | OAR21_46936641                                               | 40.874274                                        |
| Obs_Htz51 | 22 | Milk Lacaune<br>East Frisian Brown             | OAR22_23392099<br>OAR22_24747565                     | 19.587631<br>20.99124                            | OAR22_23417873                       | 19.610393                                        | Meat Lacaune<br>Australian Poll Merino                         | OAR22_23392099<br>OAR22_26275112                                     | 19.587631<br>22.366773                           | OAR22_23446812                                               | 19.639123                                        |
| Obs_Htz52 | 22 | Comisana<br>Milk Lacaune                       | OAR22_36492428<br>OAR22_36492428                     | 31.879508<br>31.879508                           | OAR22_40197865<br>s73065             | 35.61184<br>34.30344                             | Ojalada<br>Australian Poll Merino<br>Meat Lacaune<br>Finnsheep | OAR22_36492428<br>OAR22_38946909<br>OAR22_38946909<br>OAR22_42931135 | 31.879508<br>34.273821<br>34.273821<br>38.322102 | OAR22_36576021<br>OAR22_41042892<br>s13462<br>OAR22_43010940 | 31.963576<br>36.462598<br>38.550647<br>38.403606 |
| Obs_Htz53 | 24 | Comisana<br>Milk Lacaune                       | s08130<br>s08130                                     | 26.375802<br>26.375802                           | OAR24_29399883                       | 26.984286                                        | Finnsheep<br>Ojalada                                           | OAR24_28445680<br>s08130                                             | 26.035068<br>26.375802                           | s63355<br>s48918                                             | 27.096216<br>26.58114                            |
| Obs_Htz54 | 25 | Comisana<br>East Frisian Brown<br>Milk Lacaune | s12019<br>s25195<br>s03686                           | 5.095615<br>6.235402<br>6.359903                 | s21107<br>s67158                     | 6.461437<br>6.571187                             | Australian Poll Merino<br>Meat Lacaune                         | s25195<br>s44881                                                     | 6.235402<br>6.451855                             | s67158<br>s21107                                             | 6.571187<br>6.461437                             |
| Obs_Htz55 | 25 | East Frisian Brown<br>Milk Lacaune             | OAR25_19926183<br>OAR25_20106030                     | 18.148895<br>18.316414                           | OAR25_20142347                       | 18.354065                                        |                                                                |                                                                      |                                                  |                                                              |                                                  |
